# Supplementary material
Source: PubMed Central journal article supplement (PMC3943647)
Supplement: NIHMS537810-supplement-supplement_1.pdf [file NIHMS537810-supplement-supplement_1.pdf]

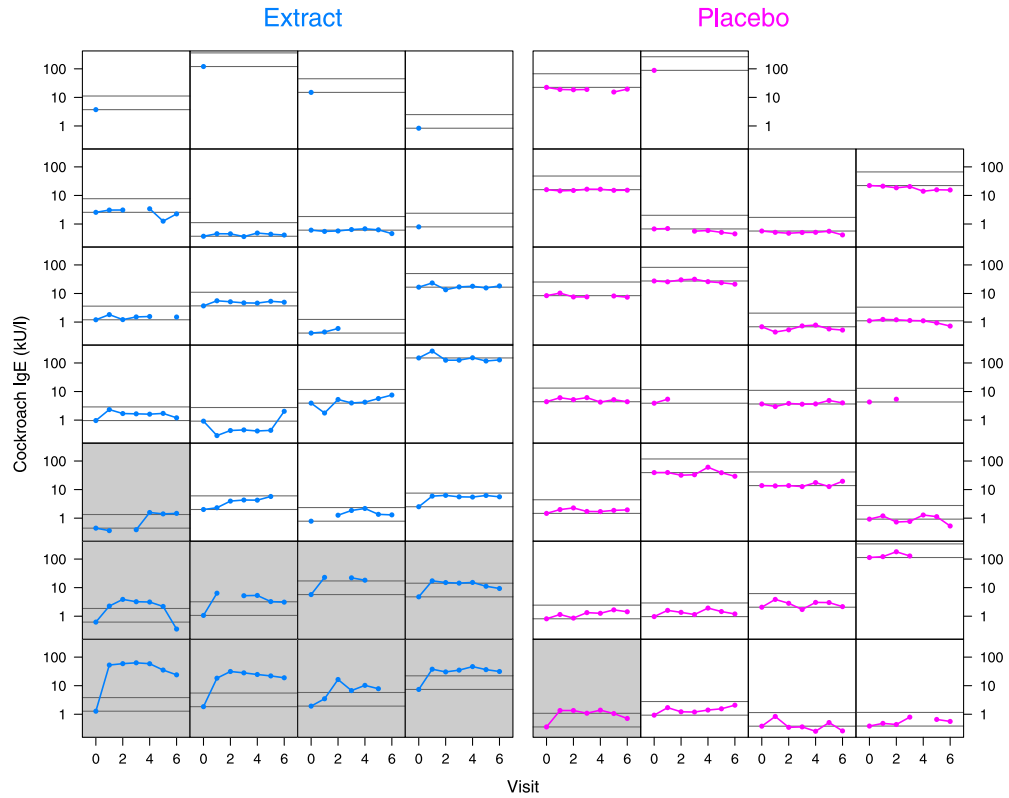

**FIG E1.** German cockroach serum IgE levels by study visit for each BioCSI participant. *Horizontal lines* indicate baseline IgE levels and a 3-fold increase from baseline values. *Shaded panels* indicate that the participant depicted had a maximum IgE level that was at least 3 times greater than the baseline value.

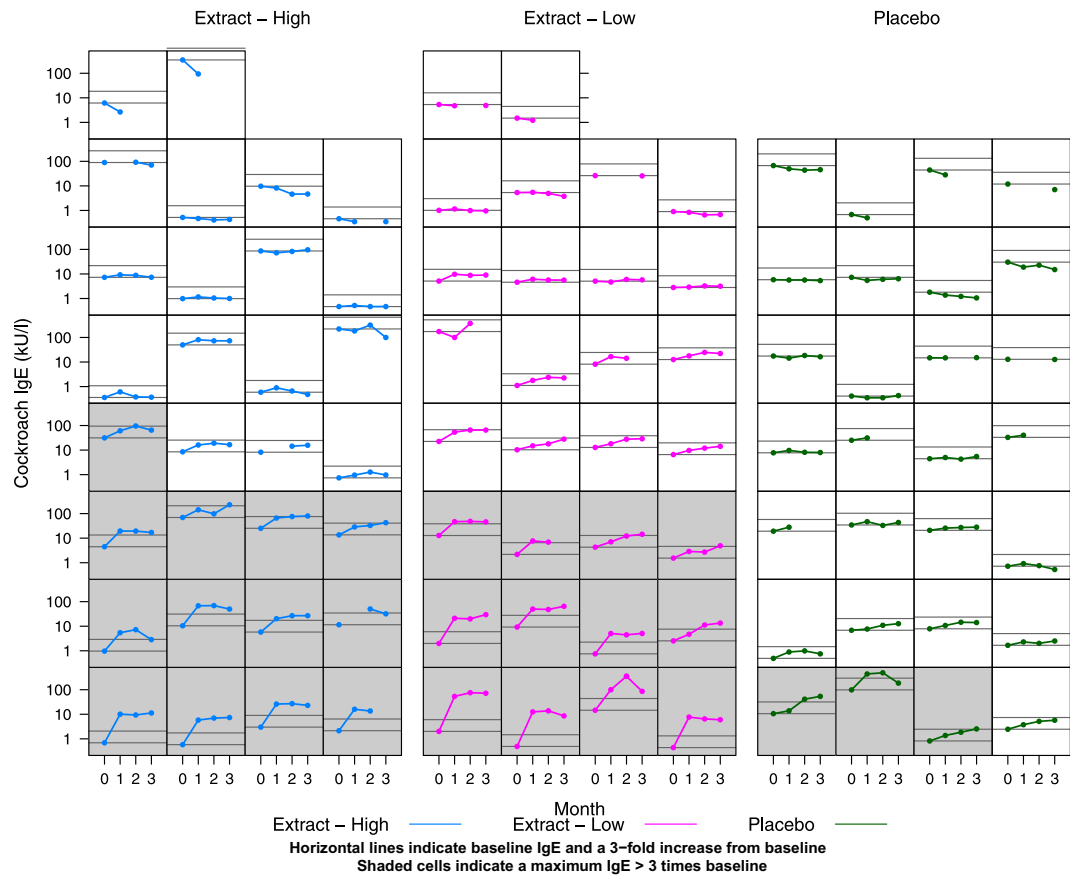

**FIG E2.** German cockroach serum IgE levels by study visit for each BioCSI2 participant. *Horizontal lines* indicate baseline IgE levels and a 3-fold increase from baseline values. *Shaded panels* indicate that the participant depicted had a maximum IgE level that was at least 3 times greater than the baseline value.

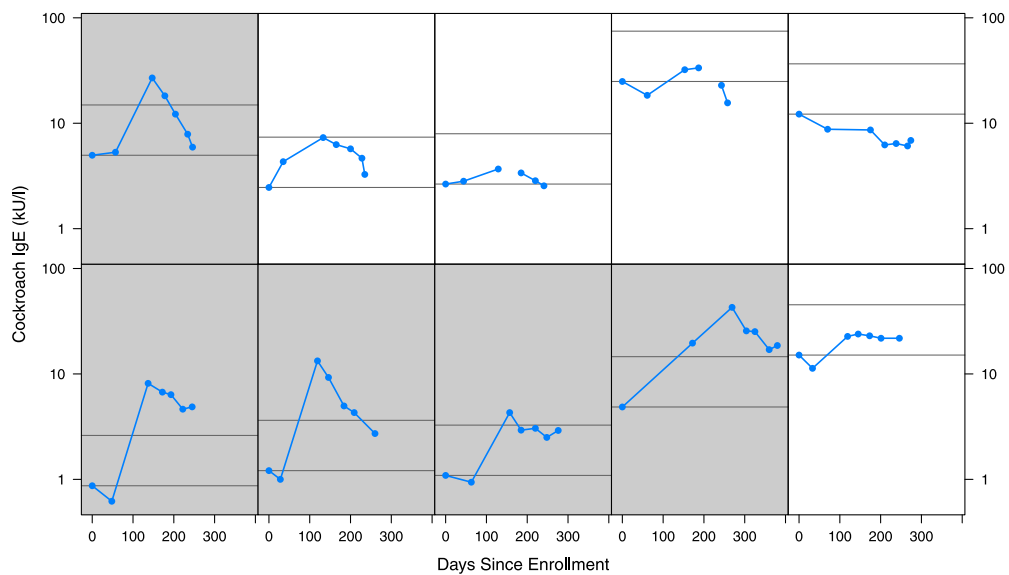

**FIG E3.** German cockroach serum IgE levels by study visit for each SCITCO participant. *Horizontal lines* indicate baseline IgE levels and a 3-fold increase from baseline values. *Shaded panels* indicate that the participant depicted had a maximum IgE level that was at least 3 times greater than the baseline value.

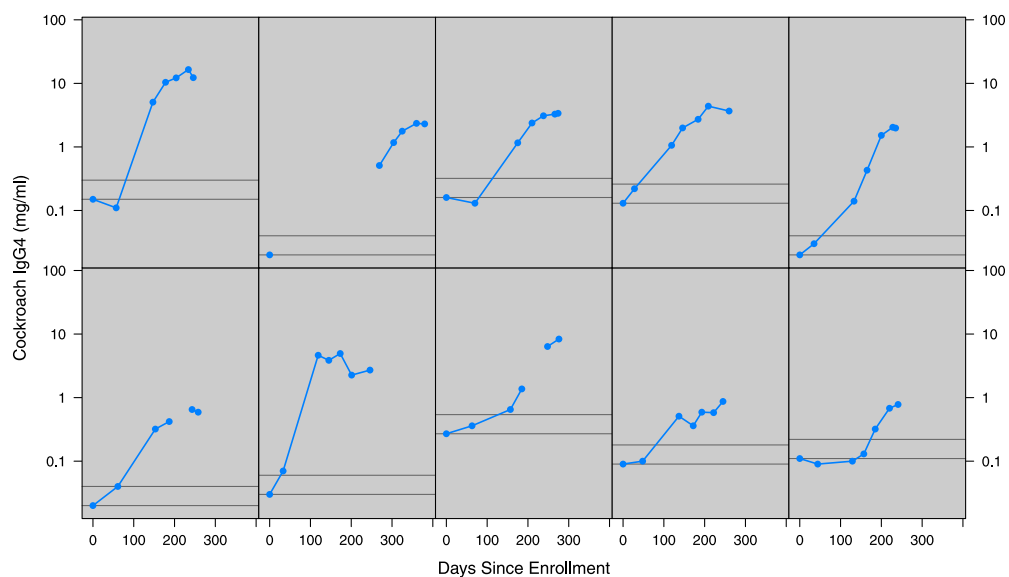

**FIG E4.** German cockroach serum IgG<sub>4</sub> levels by study visit for each SCITCO participant. *Horizontal lines* indicate baseline IgG<sub>4</sub> levels and a 2-fold increase from baseline values. *Shaded panels* indicate a maximum IgG<sub>4</sub> level that is at least 2 times greater than the baseline value.

**TABLE E1.** SCSS, BioCSI, and SCITCO dose regimens

| Dose no.                                                                | Concentration | Volume              | Approximate dose | Approximate cumulative daily dose |
|-------------------------------------------------------------------------|---------------|---------------------|------------------|-----------------------------------|
| SCSS study (1-day escalation)                                           |               |                     |                  |                                   |
| 1                                                                       | 0             | 0.14 mL             | 0 BAU*           | 0 BAU                             |
| 2                                                                       | 1:2000 wt/vol | 0.05 mL             | 4.3 BAU          | 4.3 BAU                           |
| 3                                                                       | 1:2000 wt/vol | 0.14 mL             | 12.0 BAU         | 16.3 BAU                          |
| 4                                                                       | 1:200 wt/vol  | 0.05 mL             | 42.8 BAU         | 59.1 BAU                          |
| 5                                                                       | 1:200 wt/vol  | 0.14 mL             | 120 BAU          | 179 BAU                           |
| 6                                                                       | 1:20 wt/vol   | 0.05 mL             | 428 BAU          | 608 BAU                           |
| 7                                                                       | 1:20 wt/vol   | 0.14 mL             | 1,200 BAU        | 1,807 BAU                         |
| 8*                                                                      | 1:20 wt/vol   | 0.42 mL             | 3,685 BAU        | 5,493 BAU                         |
| BioCSI study (1-day escalation)                                         |               |                     |                  |                                   |
| 1                                                                       | 0             | 0.14 mL             | 0 BAU            | 0 BAU                             |
| 2                                                                       | 1:2000 wt/vol | 0.14 mL             | 12.0 BAU         | 12 BAU                            |
| 3                                                                       | 1:200 wt/vol  | 0.14 mL             | 120 BAU          | 132 BAU                           |
| 4                                                                       | 1:20 wt/vol   | 0.14 mL             | 1,200 BAU        | 1,332 BAU                         |
| 5*                                                                      | 1:20 wt/vol   | 0.42 mL             | 3,685 BAU        | 5,017 BAU                         |
| BioCSI2 study (1-day escalation to dose 3; 4-week escalation to dose 7) |               |                     |                  |                                   |
| 0                                                                       | 0             | 0.14 mL             | 0 BAU            | 0 BAU                             |
| 1                                                                       | 1:20 wt/vol   | 0.05 mL             | 428 BAU          | 428 BAU                           |
| 2                                                                       | 1:20 wt/vol   | 0.14 mL             | 1,200 BAU        | 1,628 BAU                         |
| 3*                                                                      | 1:20 wt/vol   | 0.42 mL             | 3,685 BAU        | 5,313 BAU                         |
| 4                                                                       | 1:20 wt/vol   | 0.56 mL             | 4,913 BAU        |                                   |
| 5                                                                       | 1:20 wt/vol   | 0.70 mL             | 6,142 BAU        |                                   |
| 6                                                                       | 1:20 wt/vol   | 0.84 mL             | 7,370 BAU        |                                   |
| 7*                                                                      | 1:20 wt/vol   | 0.84 mL twice daily | 14,740 BAU       |                                   |
| Dose no.                                                                | Concentration | Volume              | Approximate dose |                                   |
| SCITCO study (12-week escalation)                                       |               |                     |                  |                                   |
|                                                                         | 1:200,000     | 0.2 mL              | 0.171 BAU        |                                   |
| Week 2                                                                  | 1:200,000     | 0.4 mL              | 0.343 BAU        |                                   |
|                                                                         | 1:200,000     | 0.8 mL              | 0.686 BAU        |                                   |
| Week 3                                                                  | 1:20,000      | 0.1 mL              | 0.857 BAU        |                                   |
|                                                                         | 1:20,000      | 0.2 mL              | 1.7 BAU          |                                   |
| Week 4                                                                  | 1:20,000      | 0.4 mL              | 3.4 BAU          |                                   |
|                                                                         | 1:20,000      | 0.8 mL              | 6.9 BAU          |                                   |
| Week 5                                                                  | 1:2,000       | 0.1 mL              | 8.6 BAU          |                                   |
|                                                                         | 1:2,000       | 0.2 mL              | 17 BAU           |                                   |
| Week 6                                                                  | 1:2,000       | 0.4 mL              | 34 BAU           |                                   |
|                                                                         | 1:2,000       | 0.8 mL              | 69 BAU           |                                   |
| Week 7                                                                  | 1:200         | 0.1 mL              | 86 BAU           |                                   |
|                                                                         | 1:200         | 0.2 mL              | 171 BAU          |                                   |
| Week 8                                                                  | 1:200         | 0.4 mL              | 343 BAU          |                                   |
|                                                                         | 1:200         | 0.8 mL              | 686 BAU          |                                   |
| Week 9                                                                  | 1:20          | 0.1 mL              | 857 BAU          |                                   |
|                                                                         | 1:20          | 0.2 mL              | 1,714 BAU        |                                   |
| Week 10                                                                 | 1:20          | 0.3 mL              | 2,571 BAU        |                                   |
|                                                                         | 1:20          | 0.4 mL              | 3,428 BAU        |                                   |
| Week 11                                                                 | 1:20          | 0.5 mL              | 4,285 BAU        |                                   |
|                                                                         | 1:20          | 0.6 mL              | 5,142 BAU        |                                   |
| Weeks 12-26*                                                            | 1:20          | 0.6 mL              | 5,142 BAU        |                                   |

BAU, Bioequivalent allergy units.

\*Maintenance dose.
